# Supplementary material
Source: publisher figshare collection journal article supplement (https://karger.figshare.com/ndownloader/files/15343973)
Supplement: Supplementary file 1 [file 15343973]

## Sheet: Sheet 1 - Supplemental Table
S1 Table
ID	Sex	Age	DKD Class	Diabets Type	Cause of Death	CKD Class	GFR (ml/min)	Creatinine (mg/dl)	Proteinuria (mg/dl)	Diabetic Therapy	CV Therapy	Smoke	Retinopathy	RLS Righ (cm)	RLS Left (cm)	Nodules	Karpinski’score	Thickening TBM	Increase in MM (0-3)	Microaneruisms	Capsular Hyalins drops	Hyalinosis GBM	Vascular hyalinosis (0-3)	% of global glomerulosclerosis	IFTA
Donor 1	M	84	I	Type II	HS	Class II	79	0.89	30	LC		Y	0	10.6	11.5	N	4	N	0	N	N	N	0	7	1
Donor 2	M	77	IIa	Type II	HS	Class II	83	0.9	30	Insulin	N/A	N	0	12.5	12	N	1	N	1	N	N	N	2	2.5	1
Donor 3	M	71	IIa	Type II	HS	Class II	75	1	0	LC	asa, β-blockers, diuretic, RAASi,statin	Y	0	11.6	11.2	N	5	Y	1	N	N	N	1	31	1
Donor 4	M	58	IIb	Type II	HS	Class II	71	1.2	0	OAD	asa, RAASi	N	0	11.4	10.6	N	6	Y	3	N	N	N	2	22	2
Donor 5	F	61	I	Type II	HS	Class II	62	1.3	25	OAD		Y	0	11	11	N	5	Y	0	N	N	N	2	5	2
Donor 6	F	72	IIa	Type II	HS	Class II	83	0.73	0	OAD	asa, β-blockers, diuretic, RAASi	Y	0	12.1	12.5	N	4	N	1	N	N	N	2	4	1
Donor 7	F	82	IIa	Type II	HS	Class II	76	0.74	30	LC	RAASi	N	0	11.3	11.9	N	7	Y	1	N	N	N	2	21.5	2
Donor 8	M	79	IIb	Type II	CT	Class II	63	1.2	0	Insulin	diuretic	Y	0	11	13	N	3	N	2	N	N	N	1	3.5	1
Donor 9	F	69	IIa	Type II	IS	Class II	62	1	10	LC	RAASi	Y	0	11.2	11.5	N	3	N	1	N	N	N	2	8	1
Donor 10	F	67	IIa	Type II	HS	Class II	82	0.76	0	OAD		N	0	9.3	9.3	N	1	N	1	N	N	Y	0	4	1
Donor 11	M	54	IIa	Type II	HS	Class I	101	0.8	0	N/A		Y	0	12	12	N	2	N	1	N	N	N	2	3	1
Donor 12	M	71	0	Type II	CT	Class II	67	1.1	50	N/A	diuretic, dozazosin, OAT	Y	0	N/A	N/A	N	4	Y	0	N	N	Y	2	13	1
Donor 13	F	70	III	Type II	HS	Class II	77	0.79	15	OAD		N	0	12	11.3	Y	1	N	2	Y	N	N	2	7	0
Donor 14	F	56	0	Type II	HS	Class II	61	1.21	75	LC	asa, beta-lbocc,diuretic, RASSi, statin	N	0	10	10	N	0	N	0	N	N	N	0	6	0
Donor 15	M	74	IIa	Type II	HS	Class II	62	1.15	0	N/A	asa, statin	N/A	0	12	12	N	7	N	1	N	N	N	2	14	1
Donor 16	F	62	III	Type II	HS	Class II	77	0.82	0	N/A	CCBs, diuretic, RAASi	Y	0	12	12	Y	3	N	3	N	Y	N	2	8	1
Donor 17	M	58	IIb	Type II	HS	Class I	108	0.65	20	Insulin	asa, CCBs	Y	0	12	12	N	4	N	3	N	N	N	2	10.5	1
Donor 18	M	69	IIa	Type II	CT	Class I	97	0.7	30	LC	β-blockers, diuretic, OAT, RAASi, statin,	Y	0	12	12	N	5	N	2	N	N	N	2	5	2
Donor 19	M	63	IIa	Type II	HS	Class II	63	1.2	20	N/A	doxazosin	Y	0	11.5	11.5	N	6	N	1	N	N	N	2	8	2
Donor 20	F	74	IIa	Type II	HS	Class II	87	0.66	11	OAD	asa, statin	N	0	11	10	N	5	N	1	N	N	N	1	16	1
Donor 21	F	66	IIa	Type II	HS	Class II	88	0.72	0	OAD	RAASi	N	0	12	12	N	1	N	1	N	N	N	1	9	1
Donor 22	M	72	III	Type II	HS	Class II	82	0.93	0	N/A	N/A	N	0	11.5	11.5	Y	4	Y	2	N	N	N	2	18	1
Donor 23	M	68	I	Type II	HS	Class II	84	0.93	0	N/A	asa, statin	N/A	0	12.2	11.5	N	6	N	0	N	N	N	0	25	2
Donor 24	F	77	IIa	Type II	IS	Class II	84	0.7	0	N/A	statin, diuretic, CCBs, RAASi	N	0	12.4	12.4	N	2	N	1	N	N	N	1	12	1
Donor 25	F	77	IIa	Type II	HS	Class II	60	0.94	0	OAD	OAT, RAASi	N	0	12	12	N	4	N	2	N	N	N	2	9.5	1
Donor 26	F	74	IIa	Type II	IS	Class I	91	0.6	0	OAD	β-blockers, diuretic	N	0	10	12.5	N	2	N	2	N	N	N	2	6.5	2
Donor 27	M	68	III	Type I	HS	Class II	67	1.26	0	OAD	asa, β-blockers, CCBs, statin	N	0	12.7	11.6	Y	2	N	2	N	N	N	2	10.5	N/A
Donor 28	F	79	IIa	Type II	CT	Class II	61	0.9	0	OAD	asa	N	0	12.6	11.3	N	4	N	1	N	N	N	2	3.5	1
Donor 29	F	69	IIa	Type II	IS	Class II	75	0.8	0	OAD	asa, statin	Y	0	12	12	N	5	N	1	N	N	Y	1	35	2
Donor 30	F	56	IIa	Type II	HS	Class I	97	0.7	0	OAD	OAT	N	0	12	12	N	2	N	1	N	N	N	2	2.5	1
Donor 31	M	76	IIa	Type II	HS	Class II	65	1.2	0	N/A	N/A	N	0	12	12	N	6	N	1	N	N	N	2	15	2
Donor 32	M	70	IIa	Type II	HS	Class I	99	0.66	0	OAD	N/A	Y	0	12	12	N	1	N	1	N	N	N	0	9	1
Donor 33	M	77	IIa	Type II	HS	Class II	64	1.1	0	Insulin	N/A	Y	0	12	12	N	6	N	1	N	N	N	0	16.5	2
Donor 34	F	68	0	Type II	HS	Class I	99	0.51	0	N/A	N/A	N	0	10	11	N	3	N	0	N	N	N	0	8.5	1
Donor 35	F	74	IIa	Type II	HS	Class II	64	0.9	0	N/A	N/A	N	0	10	10	N	3	N	1	N	Y	N	0	5.5	1
